# Supplementary material for: Impact of purple sweet potato (Ipomoea batatas L.) polysaccharides on the fecal metabolome in a murine colitis model
Source: Royal Society of Chemistry journal article supplement (doi:10.1039/d2ra00310d), 2022-01-01
Supplement: d2ra00310d1.pdf [file d2ra00310d1.pdf]

## Supplemental material:

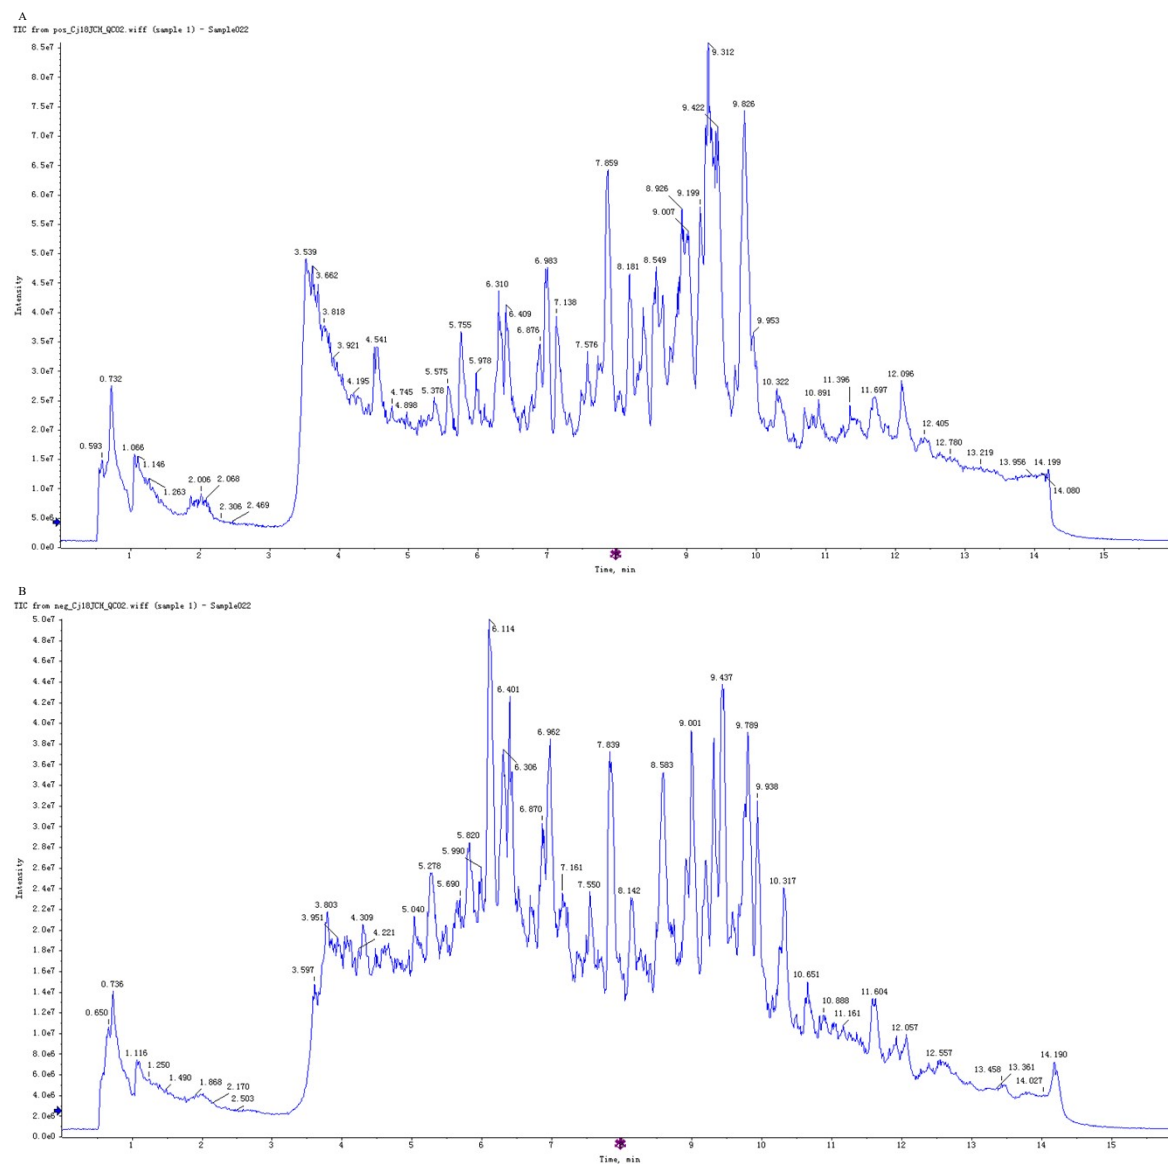

**Fig. S1.** Total ion chromatography of mass spectrometer in QC samples, (A) UPLC-TOF ESI (+), (B) UPLC-TOF ESI (-).

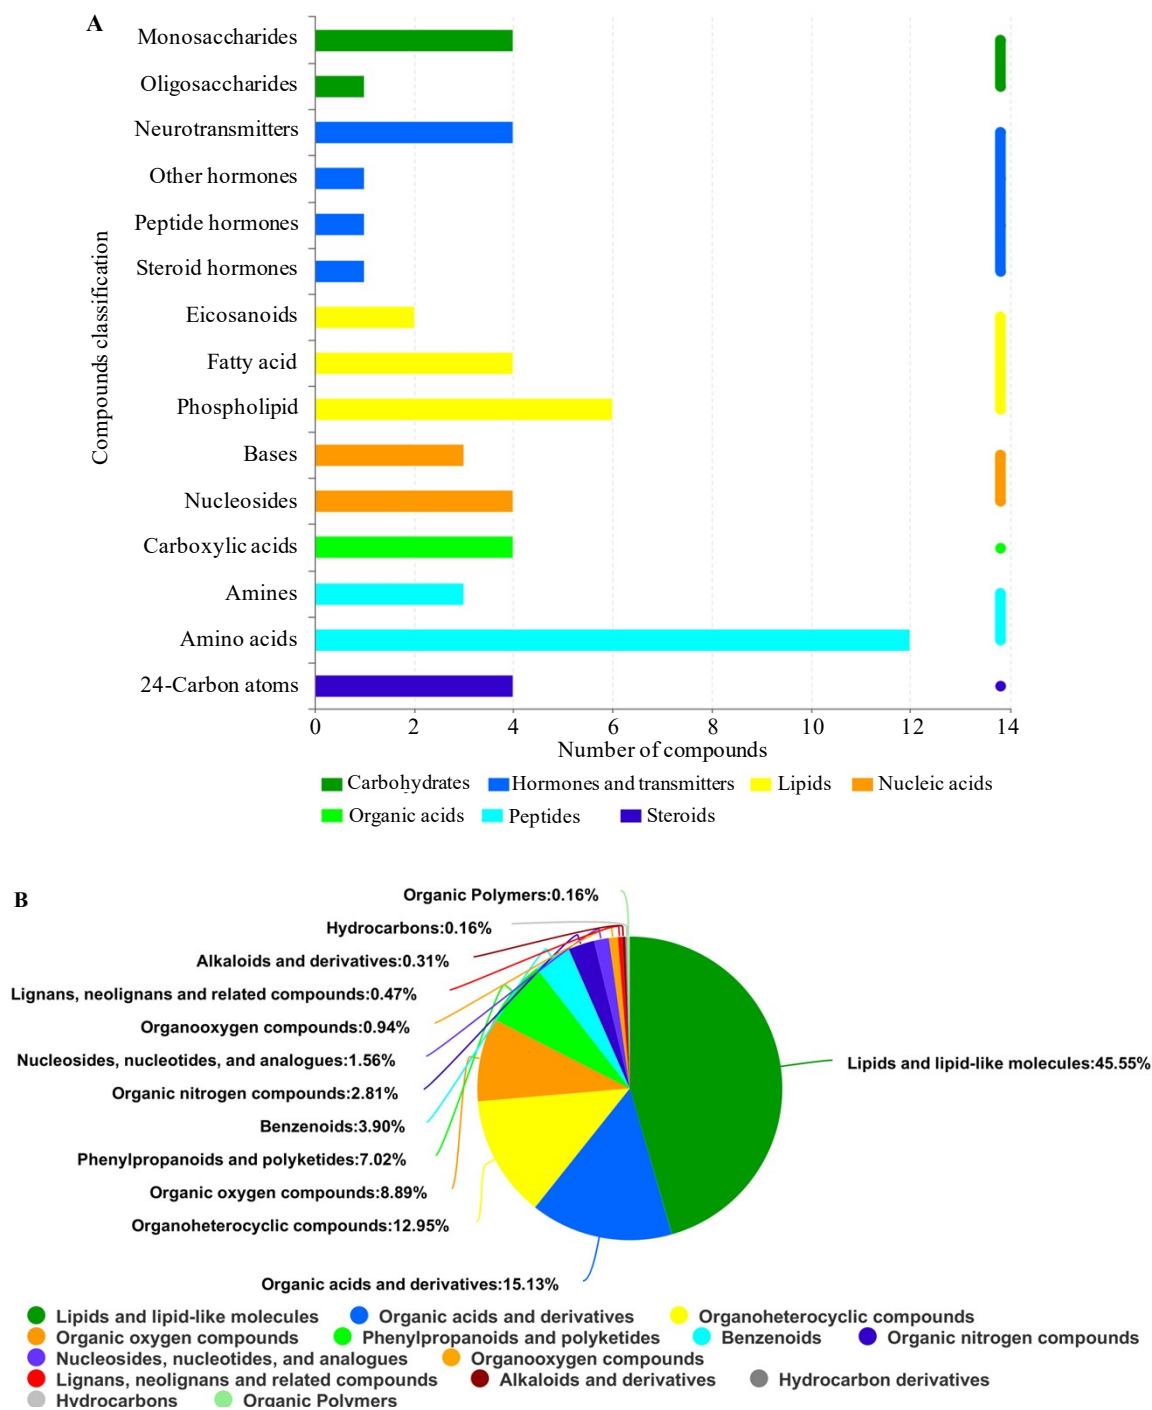

**Fig. S2.** Metabolites classification according to KEGG (A) and HMDB (B).



**Table S1**

Pathway description of KEGG topology for each metabolite set.

| Pathway                                 | DSS vs. NC   |         | DSS+PSWP-I vs.DSS |         | DSS+PSAP-I vs.DSS |         |
|-----------------------------------------|--------------|---------|-------------------|---------|-------------------|---------|
|                                         | Impact value | P value | Impact value      | P value | Impact value      | P value |
| Cutin, suberine and wax biosynthesis    | 0.0357       | 0.0272  | 0.0357            | 0.0272  | 0.0357            | 0.0182  |
| Biosynthesis of unsaturated fatty acids | 0.0000       | 0.0325  | 0.0000            | 0.0325  | 0.0000            | 0.0218  |
| Fatty acid biosynthesis                 | 0.0000       | 0.0336  | 0.0000            | 0.0336  | 0.0000            | 0.0226  |
| Steroid hormone biosynthesis            | 0.0955       | 0.0470  | 0.0955            | 0.0470  | 0.0955            | 0.0320  |
